# Supplementary material for: IGFs Potentiate TAC3-induced SLα Expression via Upregulation of TACR3 Expression in Grass Carp Pituitary Cells
Source: MDPI journal article supplement (doi:10.3390/cells8080887), 2019-08-13
Supplement: s1 [file s1]

**Supplemental Table 2** Antibodies Used in Western Blot and Immunostaining

| Peptide/protein target                            | Antigen sequence (if known)                                                                                                   | Name of Antibody                                               | Manufacturer, catalog #, and/or name of individual providing the antibody | Species raised in; monoclonal or polyclonal | RRID        |
|---------------------------------------------------|-------------------------------------------------------------------------------------------------------------------------------|----------------------------------------------------------------|---------------------------------------------------------------------------|---------------------------------------------|-------------|
| <b>Phospho-MEK1/2 (Ser217/221)</b>                | a synthetic phosphopeptide (KLP-coupled) corresponding to residues around Ser217/221 of human MEK1/2.                         | Phospho-MEK1/2 (Ser217/221) mAb                                | Cell Signaling Technology, Inc., catalog #9154                            | monoclonal IgG in Rabbit                    | AB_2138017  |
| <b>MEK1/2</b>                                     | a synthetic peptide (KLH coupled) covering the conserved region of human, rat and mouse MEK1/2.                               | MEK1/2 Antibody (for total MEK1/2)                             | Cell Signaling Technology, Inc., catalog #9122                            | polyclonal in Rabbit                        | AB_823567   |
| <b>Activated (Diphosphorylated) ERK1/2</b>        | a synthetic peptide (KLH coupled) with HTGFLTpEYpVAT sequence corresponding to the phosphorylated form of ERK-activation loop | Diphosphorylated ERK1/2 mAb                                    | Sigma-Aldrich Co. , catalog #M8159                                        | monoclonal IgG1 in Mouse                    |             |
| <b>ERK-1/2</b>                                    | a synthetic peptide (KLH coupled) with RRITVEEALAHPLYEQ YYDPTDE sequence derived from subdomain-XI of human ERK1/2.           | ERK1/2 Antibody (for total ERK1/2)                             | Sigma-Aldrich Co. , catalog #M5670                                        | polyclonal in Rabbit                        |             |
| <b>Phospho-Akt (Ser473)</b>                       | a synthetic phosphopeptide (KLH-coupled) corresponding to residues surrounding Ser473 of mouse Akt.                           | Phospho-Akt (Ser473) Antibody                                  | Cell Signaling Technology, Inc., catalog #92705                           | polyclonal in Rabbit                        | AB_10694411 |
| <b>Akt</b>                                        | a synthetic peptide (KLH-coupled) derived from the carboxy-terminal sequence of mouse Akt.                                    | Akt Antibody (for total Akt)                                   | Cell Signaling Technology, Inc., catalog #9272                            | polyclonal in Rabbit                        | AB_329827   |
| <b>Phospho-p<sub>38</sub>MAPK (Thr180/Tyr182)</b> | a synthetic phosphopeptide (KLP-coupled) corresponding to residues surrounding Thr180/Tyr182 of human p38MAP kinase           | Phospho-p <sub>38</sub> MAPK (Thr180/Tyr182) Antibody          | Cell Signaling Technology, catalog #5140                                  | polyclonal in Rabbit                        |             |
| <b>p<sub>38</sub>MAPK</b>                         | a synthetic peptide (KLP-coupled) derived from human p <sub>38</sub> MAP kinase                                               | p <sub>38</sub> MAPK Antibody (for total p <sub>38</sub> MAPK) | MBL International, catalog # JM-3114-100                                  | IgG in Rabbit                               | AB_592669   |
| <b>β Actin</b>                                    | a synthetic peptide (KLH coupled) covering the conserved region of human, rat and mouse Actin.                                | Anti-Actin mAb                                                 | Calbiochem, catalog #CP01                                                 | monoclonal IgM in Mouse                     |             |
| <b>carp somatolactin alpha</b>                    | Recombinant carp SLα (GenBank No EF372074.1)                                                                                  | Antiserum against carp SLα                                     | Prof AOL Wong, HKU, Hong Kong                                             | polyclonal in Rabbit                        | AB_2631193  |
| <b>carp somatolactin beta</b>                     | Recombinant carp SLβ (GenBank No EF372075.1)                                                                                  | Antiserum against carp SLβ                                     | Prof AOL Wong, HKU, Hong Kong                                             | polyclonal in Rabbit                        | AB_2631194  |

Abbreviations: KLH, keyhole limpet hemocyanin; mAb, monoclonal antibody.
