# Supplementary material for: IGFs Potentiate TAC3-induced SLα Expression via Upregulation of TACR3 Expression in Grass Carp Pituitary Cells
Source: MDPI journal article supplement (doi:10.3390/cells8080887), 2019-08-13
Supplement: s1 [file s1]

**Supplemental Table 1**

The information for the drugs used in receptor specificity and signal transduction.

| Item          | Function                       | Manufacture       | Cat. No.    |
|---------------|--------------------------------|-------------------|-------------|
| Hemokinin-1   | NK1R agonist                   | Tocris Bioscience | 1068        |
| GR64349       | NK2R agonist                   | Tocris Bioscience | 1668        |
| Senktide      | NK3R agonist                   | Tocris Bioscience | 1535        |
| L-732128      | NK1R antagonist                | Tocris Bioscience | 0868        |
| GR159897      | NK2R antagonist                | Tocris Bioscience | 1274        |
| SB222200      | NK3R antagonist                | Tocris Bioscience | 1393        |
| 8Br.cAMP      | cAMP analog                    | Calbiochem        | 203800      |
| Forskolin     | AC activator                   | Sigma             | F6886       |
| Dic 8         | DAG analog                     | Echelon           | P-3008      |
| TPA           | PKC activator                  | Tocris Bioscience | 1201        |
| A23187        | Ca <sup>2+</sup> ionophore     | Calbiochem        | 100105      |
| Bay K8644     | VSCC activator                 | Sigma             | B112        |
| MDL12330A     | AC inhibitor                   | Merck             | 444200      |
| H89           | PKA inhibitor                  | Calbiochem        | 371963      |
| GF109203X     | PKC inhibitor                  | Sigma             | B6292       |
| U73122        | PLC inactivator                | Sigma             | U6756       |
| 2-APB         | IP3 receptor blocker           | Calbiochem        | 100065      |
| Nifedipine    | VSCC blocker                   | Sigma             | N-7634      |
| Calmidazolium | CaM antagonist                 | RBI               | C-100       |
| KN62          | CaMK-II blocker                | Calbiochem        | 422706      |
| PQ401         | IGF-IR inhibitor               | Calbiochem        | 407248      |
| PPP           | IGF-IR inhibitor               | Calbiochem        | 407247      |
| HNMPA         | Insulin receptor inhibitor     | Enzo              | EI-248-0005 |
| Wortmannin    | PI <sub>3</sub> K inhibitor    | Calbiochem        | 681675      |
| Rapamycin     | mTOR inhibitor                 | Calbiochem        | 553210      |
| PD98059       | MEK <sub>1/2</sub> inhibitor   | Calbiochem        | 513000      |
| SB203580      | p <sub>38</sub> MAPK inhibitor | Calbiochem        | 559389      |
