# Supplementary material for: IGFs Potentiate TAC3-induced SLα Expression via Upregulation of TACR3 Expression in Grass Carp Pituitary Cells
Source: MDPI journal article supplement (doi:10.3390/cells8080887), 2019-08-13
Supplement: s1 [file s1]

### Supplemental Table 3

Primers used for tissue distribution and quantitative real-time PCR.

| Target                                 | Forward primer         | Reverse primer        | Length | Annealing<br>T <sub>m</sub> | Accession<br>No. |
|----------------------------------------|------------------------|-----------------------|--------|-----------------------------|------------------|
| <b>Primers for tissue distribution</b> |                        |                       |        |                             |                  |
| TACR3                                  | GCCAAGAGAAAGGTTGTGAAGA | GTGTACATGCTGCTCTGGCG  | 330 bp | 56°C                        | JQ254913         |
| IGF-IR                                 | ATCATGGAGCTGATGACACGA  | CTCTGGAGACATCCAGCGCAC | 312 bp | 50°C                        | EU816193         |
| β-Actin                                | CTGGTATCGTGATGGACTCT   | AGCTCATAGCTCTTCTCCAG  | 280 bp | 56°C                        | DQ211096         |
| <b>qPCR primers</b>                    |                        |                       |        |                             |                  |
| SLα                                    | ACCCACTGTACTTCAATCTCC  | CGTCGTAACGATCAAGAGTAG | 283 bp | 52°C                        | EF372074.1       |
| TACR3                                  | GCCAAGAGAAAGGTTGTGAAGA | GTGTACATGCTGCTCTGGCG  | 330 bp | 56°C                        | JQ254913         |
| β-Actin                                | CTGGTATCGTGATGGACTCT   | AGCTCATAGCTCTTCTCCAG  | 280 bp | 56°C                        | DQ211096         |
